# Supplementary material
Source: PubMed Central journal article supplement (PMC10799761)
Supplement: glad247_suppl_supplementary_tables_1_figures_1-4.pdf [file glad247_suppl_supplementary_tables_1_figures_1-4.pdf]

## Supplementary Material

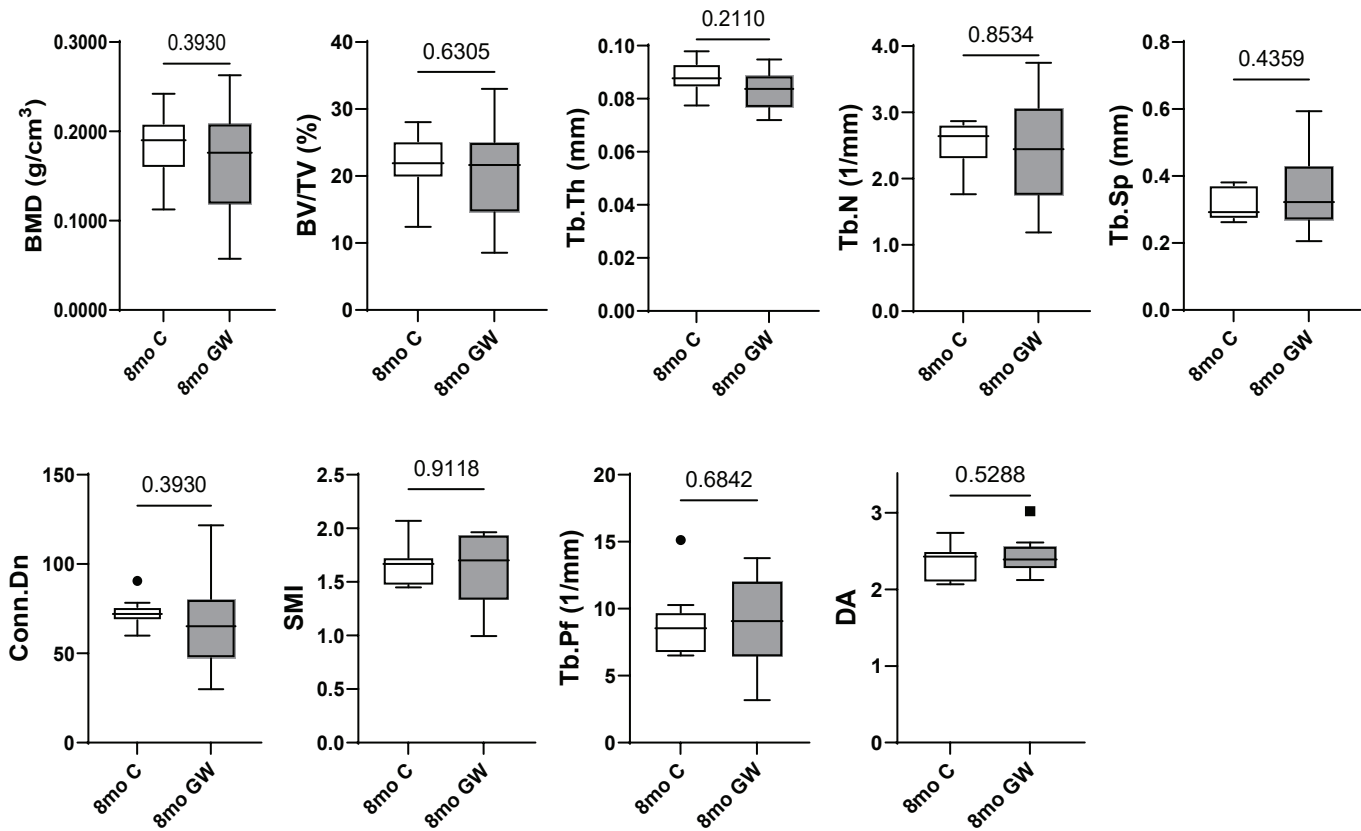

**Supplementary Figure 1.** uCT analysis of vertebrae from 8-mo-old female C57BL/6 mice treated without or with GW9662 for 6 weeks. Values are given as mean  $\pm$  SD; n = 10 mice/group. Unpaired t-test, p values are indicated. Symbols (dot and square) denote outliers. BMD, bone mineral density; BV/TV, bone volume/tissue volume; Tb. Th, trabecular thickness; Tb. N, trabecular number; Tb. Sp, trabecular spacing; Conn.Dn., connectivity density; SMI, structure model index; Tb.Pf, trabecular pattern factor; DA, Degree of anisotropy.

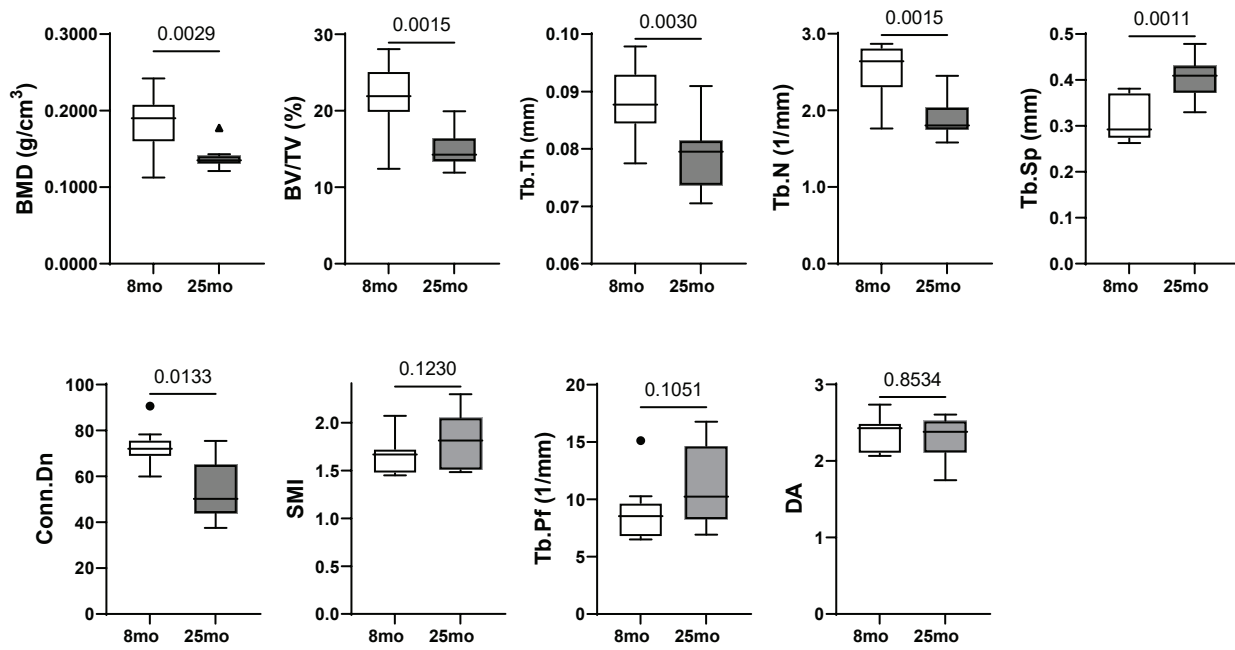

**Supplementary Figure 2.** uCT analysis of vertebrae from 8- and 25-mo-old female C57BL/6 mice. Values are given as mean  $\pm$  SD; n = 10 mice/group. Unpaired t-test, p values are indicated. Symbols (dot and square) denote outliers.

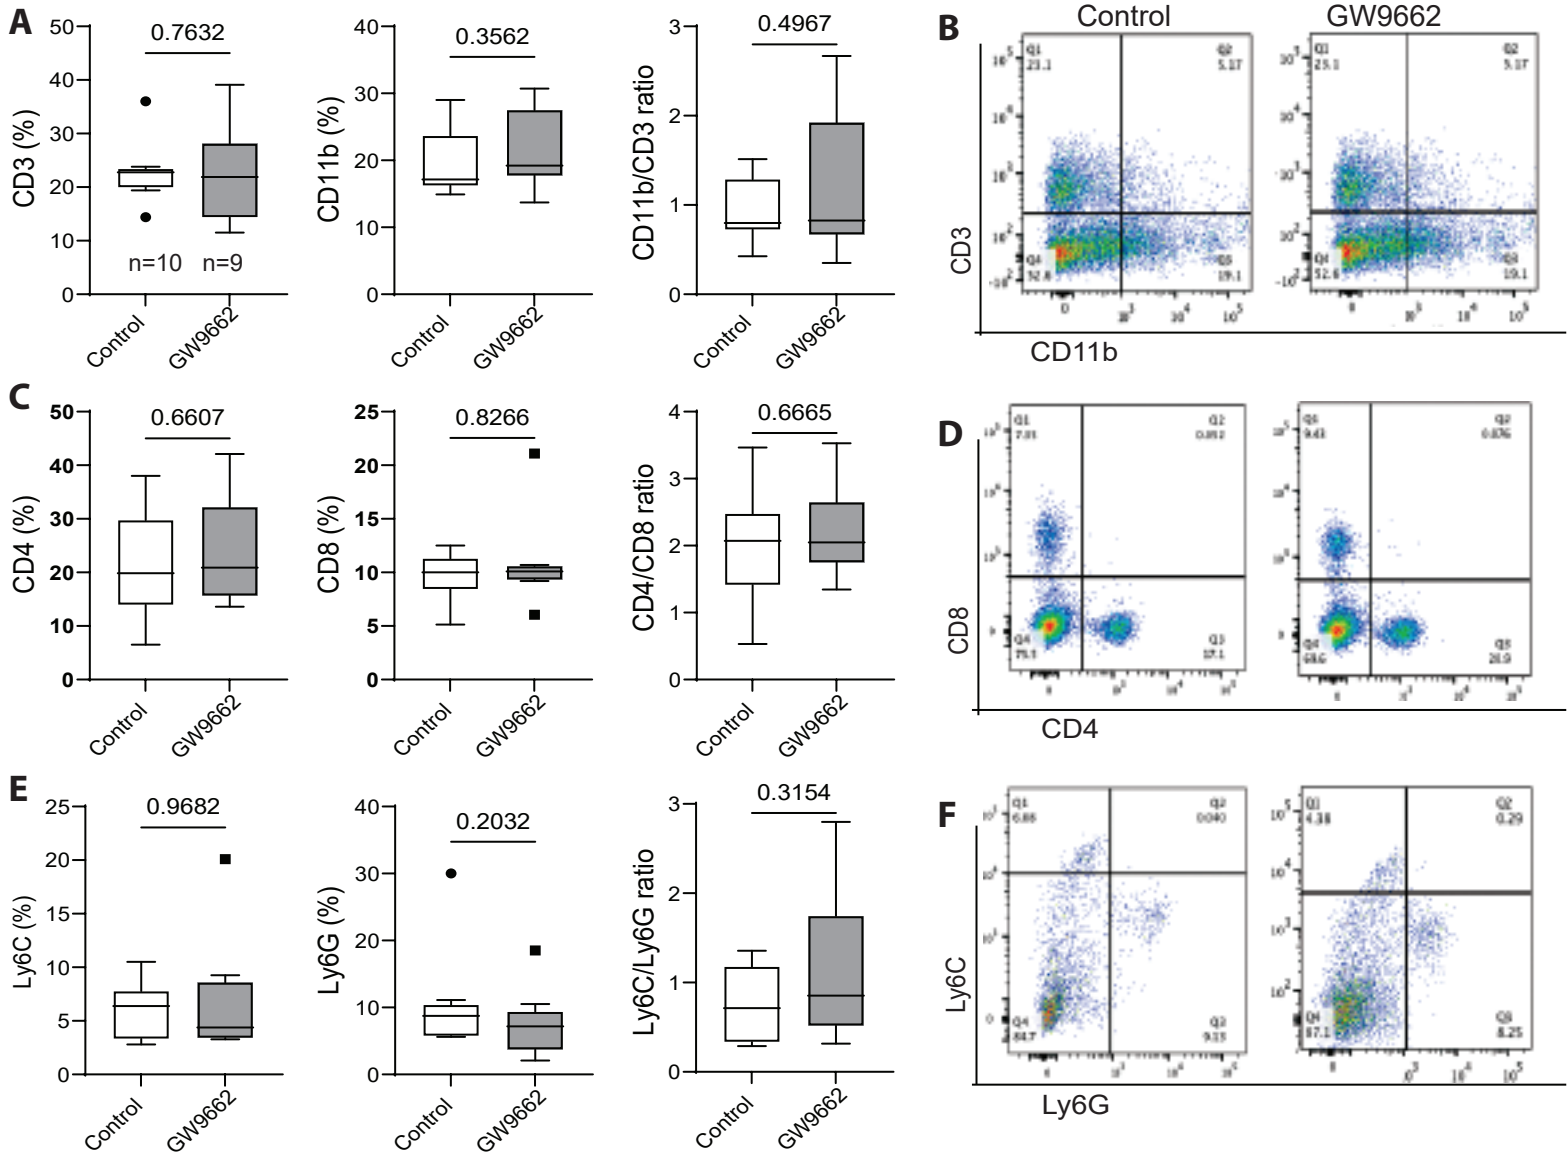

**Supplementary Figure 3.** FACS analysis of splenocytes from 25-mo-old female C57BL/6 mice treated without or with GW9662 or 6 weeks. The experiment was performed as described in Figure 4. Values are given as mean  $\pm$  SD; n = 9 - 10 mice/group. Unpaired t-test, p values are indicated. Symbols (black dots and squares, included in dataset) denote outliers.

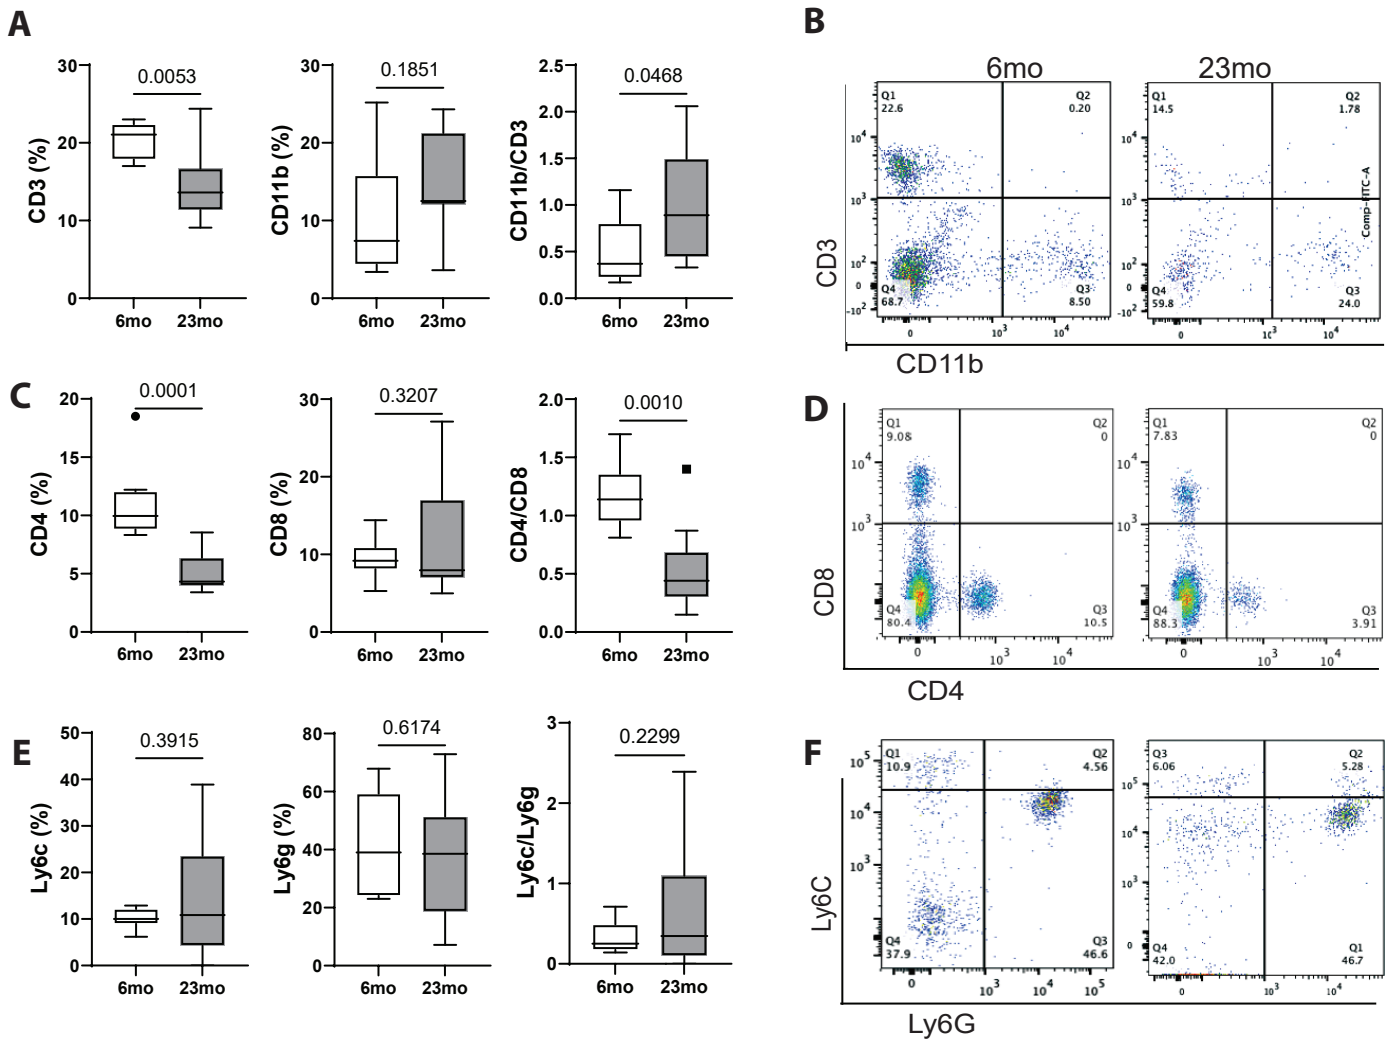

**Supplementary Figure 4.** FACS analysis of blood cells prior to GW9662 treatment (baseline) in 6- and 25-mo-old female C57BL/6 mice. (A, C, E) Bar graphs showing percentages of immune cells positive for indicated cell surface makers. (B, D, F) Representative flow cytometry dot plots showing distribution of cells positive for the markers detected. Values are given as mean  $\pm$  SD; n = 10 mice/group. Unpaired t-test, p values are indicated. Symbols (dots and squares) denote outliers.
